# Supplementary material for: Urinary Proteome Differences in Canine Diabetes with and without the Presence of Microalbuminuria
Source: MDPI journal article supplement (doi:10.3390/ani12060748), 2022-03-16
Supplement: s1 [file s1]

Table S1. Clinical and biochemical parameters for the healthy, DM I, and DM II subjects.

|                                  | Unit   | Healthy<br>(n=7)        | DM I<br>(n=7)    | DM II<br>(n=7)   |
|----------------------------------|--------|-------------------------|------------------|------------------|
| Gender (M/F)                     | None   | 4M, 3F                  | 4M, 3F           | 3M,4F            |
| Age                              | Years  | 7 [5-9]                 | 7 [6-9]          | 8 [5-10]         |
| BCS                              | None   | 5                       | 6 [3-7]          | 6 [3-7]          |
| Duration of<br>diabetes mellitus | month  | 0                       | 23 [7-48]        | 35 [9-48]        |
| Systolic Blood<br>Pressure       | mmHg   | 123 [110-148]           | 154 [120-178]    | 159 [134-169]    |
| Serum<br>Fructosamine            | μmol/L | 234 [210-252]           | 328 [317-340]    | 331 [320-369]    |
| Urine PCR                        | -      | 0.02 [0.003-0.08]       | 0.15 [0.04-0.20] | 0.17 [0.10-0.20] |
| Urine ACR                        | -      | 0.002 [0.0005-<br>0.01] | 0.7[0.04-0.10]   | 0.28 [0.16-0.30] |

BCS: body condition score; Urine PCR: urine protein to creatinine ratio; Urine ACR: albumin urine to creatinine ration
